# Supplementary material for: Deep Brain Stimulation of the Subthalamic Nucleus Improves Lexical Switching in Parkinsons Disease Patients
Source: PubMed Central journal article supplement (PMC5004923; doi:10.1371/journal.pone.0161404), 2016-08-30
Supplement: pone.0161404.s001.pdf [file pone.0161404.s001.pdf]

### Healthy controls' characteristics

| <b>Participant</b> | <b>gender male/female</b> | <b>age in years</b> | <b>education in years</b> | <b>handedness left/right</b> | <b>netPANDA</b> |
|--------------------|---------------------------|---------------------|---------------------------|------------------------------|-----------------|
| Contr1             | m                         | 63                  | 10                        | R                            | 17              |
| Contr2             | m                         | 57                  | 10                        | R                            | 19              |
| Contr3             | f                         | 69                  | 10                        | R                            | 18              |
| Contr4             | m                         | 52                  | 9                         | L                            | 16              |
| Contr5             | m                         | 71                  | 8                         | L                            | 16              |
| Contr6             | m                         | 71                  | 13                        | R                            | 20              |
| Contr7             | f                         | 65                  | 13                        | R                            | 23              |
| Contr8             | f                         | 65                  | 13                        | R                            | 23              |
| Contr9             | m                         | 66                  | 13                        | R                            | 19              |
| Contr10            | m                         | 66                  | 9                         | L                            | 13              |
| Contr11            | m                         | 69                  | 10                        | R                            | 21              |

Shown are the subject characteristics of the healthy control group.

netPANDA = Parkinson Neuropsychometric Dementia Assessment (PANDA) score without VF test items – maximum 23 points
