# Supplementary material for: Deep Brain Stimulation of the Subthalamic Nucleus Improves Lexical Switching in Parkinsons Disease Patients
Source: PubMed Central journal article supplement (PMC5004923; doi:10.1371/journal.pone.0161404), 2016-08-30
Supplement: pone.0161404.s002.pdf [file pone.0161404.s002.pdf]

## PD patients' characteristics

| Par  | m/f | age | education | L/R | netPANDA ON | netPANDA OFF | UPDRS-III tot ON | UPDRS-III tot OFF | Hoehn Jahr | Disease Duration | LED     | DBS duration ys |
|------|-----|-----|-----------|-----|-------------|--------------|------------------|-------------------|------------|------------------|---------|-----------------|
| PD1  | m   | 58  | 12        | L   | 13          | 13           | 25               | 66                | 3          | 17               | 0.00    | 6               |
| PD2  | m   | 68  | 10        | R   | 23          | 19           | 17               | 51                | 3          | 16               | 699.00  | 5               |
| PD3  | m   | 77  | 12        | R   | 21          | 18           | 17               | 32                | 4          | 19               | 650.00  | 2               |
| PD4  | m   | 48  | 10        | R   | 15          | 15           | 11               | 25                | 2          | 6                | 0.00    | 1               |
| PD5  | m   | 72  | 12        | R   | 13          | 20           | 13               | 25                | 2          | 15               | 490.50  | 3               |
| PD6  | f   | 56  | 10        | R   | 20          | 15           | 18               | 24                | 2          | 15               | 1300.00 | 7               |
| PD7  | f   | 63  | 8         | R   | 16          | 19           | 40               | 61                | 3          | 22               | 400.00  | 2               |
| PD8  | m   | 70  | 10        | R   | 19          | 17           | 12               | 23                | 2          | 11               | 266.00  | 4               |
| PD9  | m   | 73  | 8         | R   | 21          | 19           | 13               | 26                | 2          | 4                | 1215.00 | 0.5             |
| PD10 | m   | 69  | 10        | R   | 14          | 11           | 25               | 45                | 2          | 9                | 0.00    | 0.5             |
| PD11 | m   | 57  | 13        | R   | 14          | 13           | 25               | 45                | 3          | 15               | 700.00  | 6               |

Shown are the subject characteristics of the PD patient group.

Par = participant

m/f = gender male/female

age = age in years

education = education in years

L/R = handedness left/right

netPANDA ON = Parkinson Neuropsychometric Dementia Assessment (PANDA) score without VF test items – maximum 23 points – in the DBS ON condition

netPANDA OFF = Parkinson Neuropsychometric Dementia Assessment (PANDA) score without VF test items – maximum 23 points – in the DBS OFF condition

UPDRS-III tot ON = Unified Parkinson's Disease Rating Scale – motor score (maximum 108 points), in the DBS ON condition

UPDRS-III tot OFF = Unified Parkinson's Disease Rating Scale – motor score (maximum 108 points), in the DBS OFF condition

Hoehn Jahr = Hoehn & Yahr score

Disease duration = disease duration in years

LED = levodopa equivalent dose per day

DBS duration ys = DBS duration in years
