# Supplementary material for: Deep Brain Stimulation of the Subthalamic Nucleus Improves Lexical Switching in Parkinsons Disease Patients
Source: PubMed Central journal article supplement (PMC5004923; doi:10.1371/journal.pone.0161404), 2016-08-30
Supplement: pone.0161404.s004.pdf [file pone.0161404.s004.pdf]

## PD patients' VF results in the DBS ON condition

|      | Phonemic non-alternating task |          |                |       |          |          | Phonemic alternating task |          |                |       |          |          | Semantic alternating task |          |                |       |          |          | Semantic non-alternating task |          |                |       |          |          |
|------|-------------------------------|----------|----------------|-------|----------|----------|---------------------------|----------|----------------|-------|----------|----------|---------------------------|----------|----------------|-------|----------|----------|-------------------------------|----------|----------------|-------|----------|----------|
| par  | N words                       | Sw. time | Intra-cl. time | N cl. | Cl. size | N switch | N words                   | Sw. time | Intra-cl. time | N cl. | Cl. size | N switch | N words                   | Sw. time | Intra-cl. time | N cl. | Cl. size | N switch | N words                       | Sw. time | Intra-cl. time | N cl. | Cl. size | N switch |
| PD1  | 15                            | 9.75     | 3.98           | 4     | 1.75     | 8        | 13                        | 12.15    | 3.89           | 5     | 1.40     | 6        | 18                        | 9.84     | 3.36           | 4     | 2.75     | 7        | 11                            | 18.64    | 4.70           | 4     | 1.50     | 5        |
| PD2  | 28                            | 6.05     | 2.1            | 7     | 2.57     | 10       | 24                        | 7.57     | 2.29           | 5     | 2.80     | 10       | 27                        | 7.47     | 1.28           | 5     | 3.20     | 11       | 25                            | 5.52     | 2.14           | 6     | 2.50     | 10       |
| PD3  | 16                            | 9.31     | 3              | 5     | 1.60     | 8        | 9                         | 26.31    | 5.24           | 3     | 1.67     | 4        | 15                        | 15.52    | 0.6            | 5     | 1.40     | 8        | 8                             | 32.34    | 4.13           | 3     | 1.67     | 3        |
| PD4  | 34                            | 5.52     | 1.47           | 9     | 2.33     | 13       | 18                        | 9.26     | 4.58           | 4     | 2.75     | 7        | 23                        | 8.01     | 3.23           | 8     | 1.75     | 9        | 19                            | 10.85    | 2.80           | 4     | 2.75     | 8        |
| PD5  | 22                            | 10.79    | 2.2            | 5     | 3.00     | 7        | 31                        | 6.06     | 2.6            | 8     | 2.88     | 8        | 29                        | 7.03     | 1.80           | 8     | 2.50     | 9        | 23                            | 12.44    | 1.83           | 6     | 2.67     | 7        |
| PD6  | 20                            | 10.17    | 1.70           | 6     | 2.00     | 8        | 13                        | 14.33    | 6.79           | 4     | 2.25     | 4        | 17                        | 10.86    | 0.57           | 7     | 1.00     | 10       | 14                            | 9.60     | 0.77           | 3     | 2.00     | 8        |
| PD7  | 19                            | 12.17    | 2.94           | 4     | 3.00     | 7        | 17                        | 9.56     | 3.02           | 6     | 1.33     | 9        | 21                        | 10.07    | 2.66           | 4     | 3.25     | 8        | 18                            | 13.46    | 3.42           | 3     | 4.00     | 6        |
| PD8  | 12                            | 11.89    | 3.65           | 3     | 1.67     | 7        | 13                        | 19.51    | 4.15           | 2     | 4.50     | 4        | 21                        | 8.87     | 2.92           | 6     | 2.00     | 9        | 10                            | 18.34    | 4.71           | 3     | 1.67     | 5        |
| PD9  | 20                            | 10.42    | 2.98           | 7     | 1.71     | 8        | 10                        | 23.78    | 5.92           | 3     | 2.00     | 4        | 22                        | 6.66     | 2.93           | 7     | 1.71     | 10       | 15                            | 22.23    | 3.67           | 3     | 3.67     | 4        |
| PD10 | 4                             | 5.66     | 27.99          | 1     | 2.00     | 2        | 5                         | 95.00    | 3.67           | 2     | 1.50     | 2        | 16                        | 10.60    | 4.86           | 6     | 1.50     | 7        | 9                             | 13.98    | 4.66           | 3     | 1.67     | 4        |
| PD11 | 20                            | 7.37     | 3.14           | 5     | 2.60     | 7        | 13                        | 11.53    | 5.47           | 4     | 1.75     | 6        | 15                        | 12.00    | 4.89           | 5     | 1.80     | 6        | 9                             | 10.81    | 4.88           | 2     | 2.50     | 4        |

Shown are the results of PD patients in their DBS ON condition in all four VF tasks.

par = participant

N words = total number of generated words

switch time = mean pause length between words belonging to separate clusters in sec.

Intra-cl. time = mean pause length between words belonging to the same cluster

N cl. = total number of produced clusters

Cl size = mean number of clusters

N switch = total number of produced switches
