# Supplementary material for: Deep Brain Stimulation of the Subthalamic Nucleus Improves Lexical Switching in Parkinsons Disease Patients
Source: PubMed Central journal article supplement (PMC5004923; doi:10.1371/journal.pone.0161404), 2016-08-30
Supplement: pone.0161404.s005.pdf [file pone.0161404.s005.pdf]

## PD patients' VF results in the DBS OFF condition

| par  | Phonemic non-alternating task |          |                |       |          |          | Phonemic alternating task |          |                |       |          |          | Semantic alternating task |          |                |       |          |          | Semantic non-alternating task |          |                |       |          |          |
|------|-------------------------------|----------|----------------|-------|----------|----------|---------------------------|----------|----------------|-------|----------|----------|---------------------------|----------|----------------|-------|----------|----------|-------------------------------|----------|----------------|-------|----------|----------|
|      | N words                       | Sw. time | Intra-cl. time | N cl. | Cl. size | N switch | N words                   | Sw. time | Intra-cl. time | N cl. | Cl. size | N switch | N words                   | Sw. time | Intra-cl. time | N cl. | Cl. size | N switch | N words                       | Sw. time | Intra-cl. time | N cl. | Cl. size | N switch |
| PD1  | 12                            | 18.07    | 5.68           | 3     | 2.67     | 4        | 5                         | 60.36    | 8.65           | 1     | 3.00     | 2        | 13                        | 13.04    | 4.03           | 3     | 2.67     | 5        | 4                             | 4.08     | 7.45           | 2     | 1.00     | 2        |
| PD2  | 22                            | 9.20     | 2.57           | 4     | 3.50     | 8        | 22                        | 8.45     | 2.6            | 7     | 1.86     | 9        | 24                        | 9.20     | 2.49           | 6     | 2.83     | 7        | 23                            | 9.90     | 1.42           | 8     | 1.75     | 9        |
| PD3  | 13                            | 22.56    | 4.09           | 3     | 3.00     | 4        | 10                        | 21.21    | 7.43           | 3     | 2.00     | 4        | 12                        | 11.12    | 2.23           | 3     | 2.00     | 6        | 10                            | 41.72    | 4.13           | 3     | 2.33     | 3        |
| PD4  | 29                            | 7.24     | 2.06           | 6     | 3.33     | 9        | 20                        | 9.73     | 3.21           | 7     | 1.71     | 8        | 22                        | 9.29     | 2.39           | 6     | 2.33     | 8        | 25                            | 5.79     | 1.92           | 7     | 2.14     | 10       |
| PD5  | 27                            | 6.90     | 2.23           | 5     | 4.00     | 7        | 10                        | 15.51    | 3.09           | 4     | 1.50     | 4        | 20                        | 11.13    | 2.32           | 5     | 2.40     | 8        | 18                            | 9.04     | 3.34           | 6     | 1.67     | 8        |
| PD6  | 22                            | 11.76    | 2.66           | 6     | 2.67     | 6        | 10                        | 19.26    | 6.4            | 4     | 1.25     | 5        | 19                        | 7.97     | 2.45           | 6     | 1.50     | 10       | 19                            | 12.52    | 1.67           | 4     | 3.25     | 6        |
| PD7  | 26                            | 7.68     | 2.3            | 7     | 2.43     | 9        | 15                        | 13.29    | 4.46           | 5     | 1.80     | 6        | 24                        | 9.62     | 2.54           | 7     | 2.43     | 7        | 18                            | 7.49     | 4.65           | 3     | 3.33     | 8        |
| PD8  | 12                            | 11.98    | 7.71           | 4     | 1.25     | 7        | 9                         | 15.48    | 6.06           | 2     | 2.50     | 4        | 17                        | 11.55    | 4.93           | 4     | 3.00     | 5        | 9                             | 60.47    | 7.37           | 2     | 3.50     | 2        |
| PD9  | 9                             | 13.69    | 7.08           | 3     | 1.00     | 6        | 17                        | 8.86     | 4.30           | 5     | 1.80     | 8        | 19                        | 9.32     | 2.30           | 6     | 2.00     | 7        | 14                            | 12.81    | 3.85           | 4     | 1.75     | 7        |
| PD10 | 9                             | 39.23    | 9.58           | 2     | 3.50     | 2        | 4                         | 83.91    | 3.71           | 2     | 1.00     | 2        | 17                        | 8.44     | 4.38           | 5     | 1.60     | 9        | 9                             | 16.12    | 9.19           | 2     | 2.50     | 4        |
| PD11 | 9                             | 20.25    | 7.17           | 3     | 2.00     | 3        | 12                        | 13.10    | 5.78           | 5     | 1.40     | 5        | 20                        | 7.66     | 4.64           | 5     | 2.40     | 8        | 14                            | 6.61     | 1.99           | 5     | 1.40     | 7        |

Shown are the results of PD patients in their DBS OFF condition in all four VF tasks.

par = participant

N words = total number of generated words

switch time = mean pause length between words belonging to separate clusters in sec.

Intra-cl. time = mean pause length between words belonging to the same cluster

N cl. = total number of produced clusters

Cl size = mean number of clusters

N switch = total number of produced switches
